# Supplementary material
Source: PubMed Central journal article supplement (PMC3514911)
Supplement: NIHMS419259-supplement-1_si_001.pdf [file NIHMS419259-supplement-1_si_001.pdf]

## Supporting information

### Bioplasmonic Paper Mediated Rapid Urinalysis for Label-free Detection of Kidney Cancer Biomarkers

*Limei Tian*<sup>1</sup>, Jeremiah J. Morrissey<sup>2,3</sup>, *Ramesh Kattumenu*<sup>1</sup>, *Naveen Gandra*<sup>1</sup>, Evan D. Kharasch<sup>2,3,4</sup> and *Srikanth Singamaneni*<sup>1,3\*</sup>

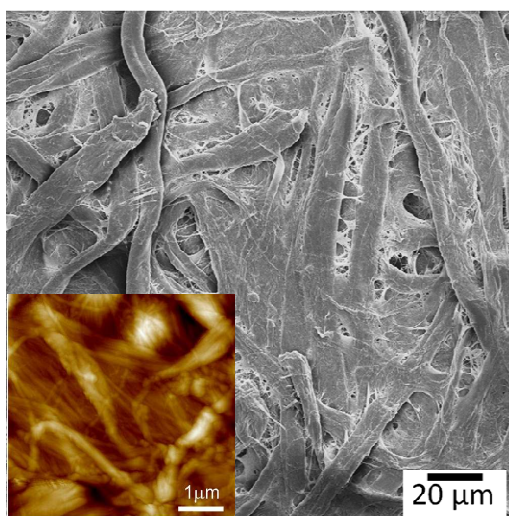

Figure S1: SEM image of the filter paper (Whatman #1). Inset: the higher magnification AFM image of the hierarchical fibrous morphology of the filter paper with cellulose nanofibers braided into microfibers (average diameter of  $\sim 0.4 \mu\text{m}$ ).

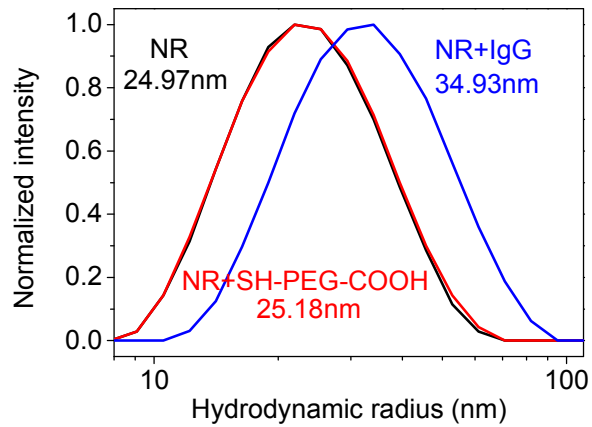

Figure S2: Dynamic light scattering (DLS) measurements showing the hydrodynamic diameter of AuNRs, AuNRs-PEG-COOH, and AuNRs-PEG-IgG. The size distribution confirmed the conjugation of SH-PEG-IgG on AuNRs, and the increase in hydrodynamic diameter mainly contributed from IgG (Mw=150KDa), but not PEG (Mw=5KDa) due to their significant difference in molecular weight.

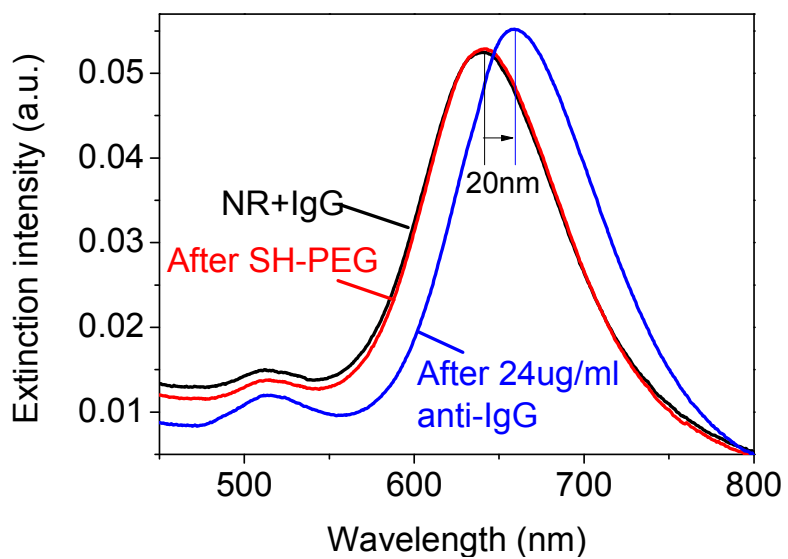

Figure S3: LSPR spectra of AuNR-IgG conjugates on a glass substrate (black), after SH-PEG nonspecific blocking step (red), and after binding of anti-IgG (blue).

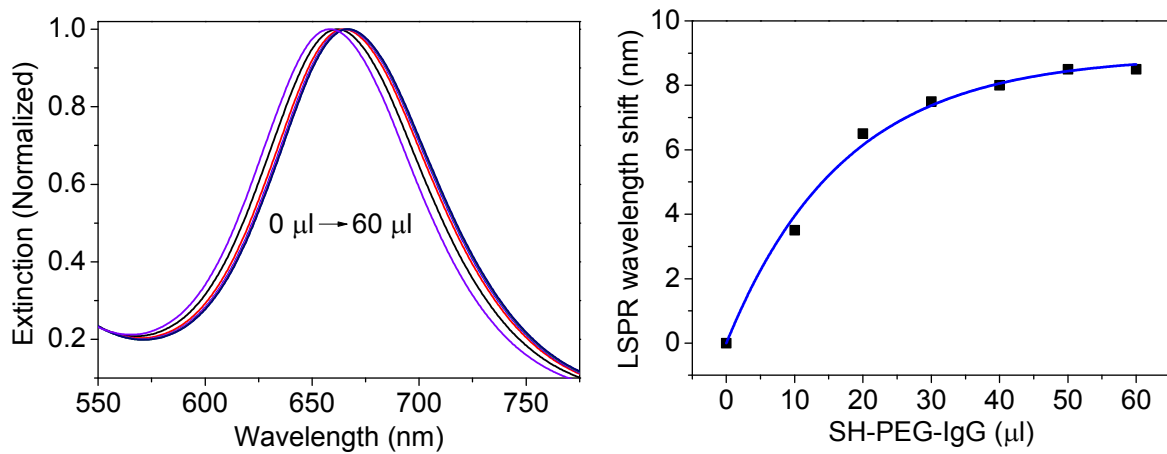

Figure S4: Extinction spectra of AuNR solution after adding different amount of SH-PEG-IgG to optimize the coverage of IgG on AuNR surface.

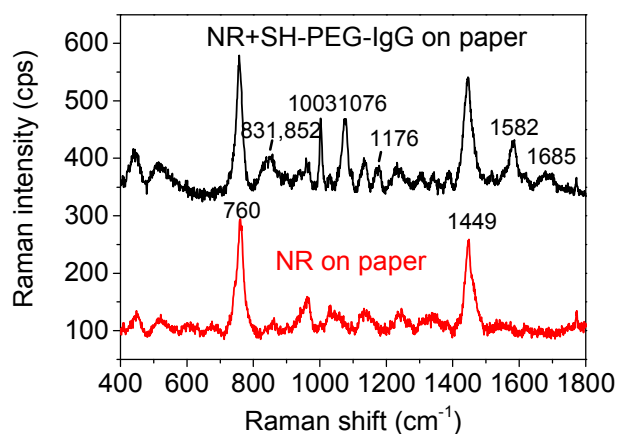

Figure S5: Raman spectra confirmed AuNR+IgG conjugates on paper substrates after incubation. The presence of IgG is evidenced by specific bands at 831  $\text{cm}^{-1}$ , 852  $\text{cm}^{-1}$  and 1176  $\text{cm}^{-1}$ , 1004  $\text{cm}^{-1}$  and 1582  $\text{cm}^{-1}$ , 1076  $\text{cm}^{-1}$ , and 1685  $\text{cm}^{-1}$  due to tyrosine, phenylalanine, symmetric stretching vibration of  $\nu_3\text{PO}_4^{3-}$ , and Amide I, respectively.

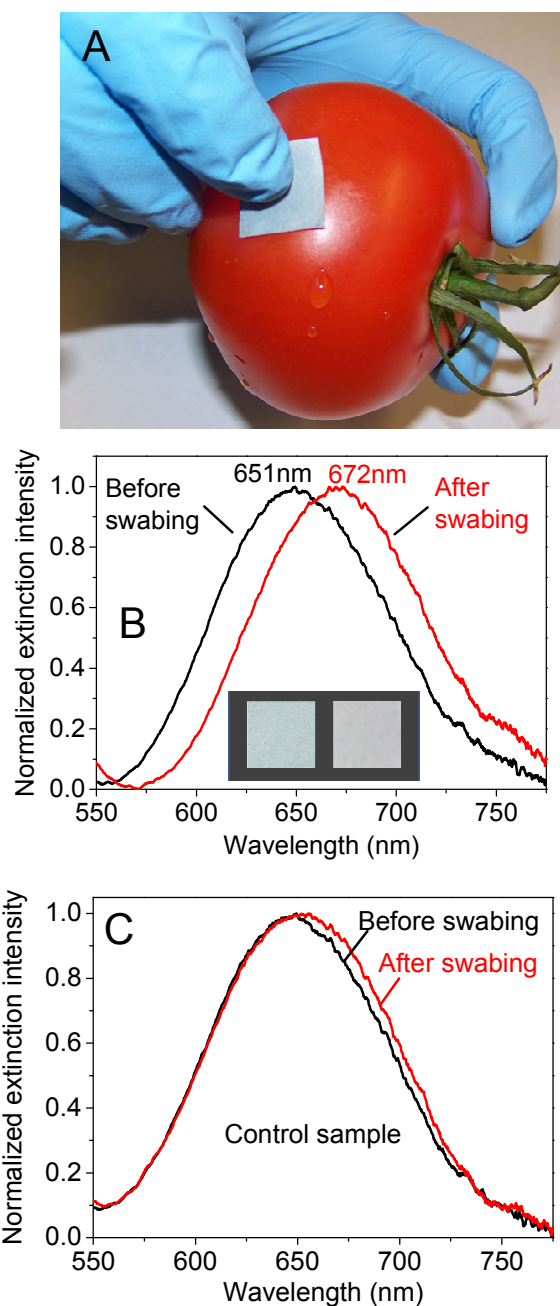

Figure S6: (A) Photograph depicting the flexibility of bioplasmonic paper as it is being swabbed on a tomato to collect 12  $\mu\text{g}$  anti-IgG spread on the surface. (B) LSPR spectra of AuNR-IgG conjugates paper before and after collecting anti-IgG (inset: shows photographs of the NR+IgG paper before (left) and after swabbing (right)). (C) LSPR spectra of AuNR-IgG conjugates paper before and after swabbing on the region without anti-IgG.
